# Supplementary material for: The queenslandensis and the type Form of the Dengue Fever Mosquito (Aedes aegypti L.) Are Genomically Indistinguishable
Source: PubMed Central journal article supplement (PMC5091912; doi:10.1371/journal.pntd.0005096), 2016-11-02
Supplement: pntd.0005096.s001.pdf [file pntd.0005096.s001.pdf]

S1 Table.

| sample_ID      | region                     | lat       | lon       | sampling method  | life stage | sex    | form        | het loci | depth | miss loci |
|----------------|----------------------------|-----------|-----------|------------------|------------|--------|-------------|----------|-------|-----------|
| QLD_G_01-01    | Gordonvale, QLD            | -17.08808 | 145.78595 | BG-Sentinel trap | adult      | female | <i>type</i> | 0.20     | 6.8   | 0.264     |
| QLD_G_05-01    | Gordonvale, QLD            | -17.09640 | 145.78479 | BG-Sentinel trap | adult      | female | <i>type</i> | 0.19     | 9.3   | 0.167     |
| QLD_G_06-02    | Gordonvale, QLD            | -17.08697 | 145.78795 | BG-Sentinel trap | adult      | female | <i>type</i> | 0.20     | 8.2   | 0.200     |
| QLD_G_08-01    | Gordonvale, QLD            | -17.08805 | 145.78708 | BG-Sentinel trap | adult      | female | <i>type</i> | 0.23     | 12.9  | 0.061     |
| QLD_G_08-04    | Gordonvale, QLD            | -17.08805 | 145.78708 | BG-Sentinel trap | adult      | female | <i>type</i> | 0.18     | 10.5  | 0.112     |
| QLD_G_11-01    | Gordonvale, QLD            | -17.09820 | 145.78293 | BG-Sentinel trap | adult      | female | <i>type</i> | 0.21     | 9.2   | 0.154     |
| QLD_G_11-03    | Gordonvale, QLD            | -17.09820 | 145.78293 | BG-Sentinel trap | adult      | female | <i>type</i> | 0.21     | 7.7   | 0.242     |
| QLD_G_12-01-01 | Gordonvale, QLD            | -17.09586 | 145.78059 | BG-Sentinel trap | adult      | female | <i>type</i> | 0.15     | 5.6   | 0.359     |
| QLD_G_22-11    | Gordonvale, QLD            | -17.08923 | 145.78517 | BG-Sentinel trap | adult      | female | <i>type</i> | 0.21     | 10.7  | 0.108     |
| QLD_G_22-19    | Gordonvale, QLD            | -17.08923 | 145.78517 | BG-Sentinel trap | adult      | female | <i>type</i> | 0.21     | 12.0  | 0.077     |
| QLD_G_23-04    | Gordonvale, QLD            | -17.09008 | 145.78402 | BG-Sentinel trap | adult      | female | <i>type</i> | 0.18     | 11.7  | 0.100     |
| QLD_G_26-02    | Gordonvale, QLD            | -17.09431 | 145.78465 | BG-Sentinel trap | adult      | female | <i>type</i> | 0.22     | 11.8  | 0.085     |
| QLD_G_26-15    | Gordonvale, QLD            | -17.09431 | 145.78465 | BG-Sentinel trap | adult      | female | <i>type</i> | 0.20     | 11.3  | 0.084     |
| QLD_G_28-01    | Gordonvale, QLD            | -17.09909 | 145.77921 | BG-Sentinel trap | adult      | female | <i>type</i> | 0.19     | 7.8   | 0.226     |
| QLD_G_92-01    | Gordonvale, QLD            | -17.09333 | 145.78364 | BG-Sentinel trap | adult      | female | <i>type</i> | 0.19     | 7.4   | 0.241     |
| BrK11-01-1     | Tubiacanga, Rio de Janeiro | -22.78507 | -43.22711 | ovitrap          | larva      | female | -           | 0.19     | 11.4  | 0.114     |
| BrK11-06-2     | Tubiacanga, Rio de Janeiro | -22.78439 | -43.22669 | ovitrap          | larva      | male   | -           | 0.18     | 8.8   | 0.192     |
| BrK11-09-4     | Tubiacanga, Rio de Janeiro | -22.78489 | -43.22501 | ovitrap          | larva      | male   | -           | 0.20     | 9.3   | 0.177     |
| BrK11-13-1     | Tubiacanga, Rio de Janeiro | -22.78523 | -43.22512 | ovitrap          | larva      | female | -           | 0.19     | 10.7  | 0.127     |
| BrK11-18-1     | Tubiacanga, Rio de Janeiro | -22.78551 | -43.22561 | ovitrap          | larva      | male   | -           | 0.18     | 10.4  | 0.144     |
| BrK11-21-3     | Tubiacanga, Rio de Janeiro | -22.78578 | -43.22522 | ovitrap          | larva      | female | -           | 0.19     | 10.2  | 0.143     |
| BrK11-23-1     | Tubiacanga, Rio de Janeiro | -         | -         | ovitrap          | larva      | male   | -           | 0.21     | 14.1  | 0.069     |
| BrK11-24-2     | Tubiacanga, Rio de Janeiro | -22.78655 | -43.22656 | ovitrap          | larva      | male   | -           | 0.21     | 13.3  | 0.075     |
| BrK11-25-2     | Tubiacanga, Rio de Janeiro | -22.78450 | -43.22653 | ovitrap          | larva      | male   | -           | 0.15     | 12.8  | 0.097     |
| BrK11-26-1     | Tubiacanga, Rio de Janeiro | -22.78561 | -43.22601 | ovitrap          | larva      | male   | -           | 0.20     | 10.4  | 0.145     |
| BrK11-27-1     | Tubiacanga, Rio de Janeiro | -22.78559 | -43.22659 | ovitrap          | larva      | male   | -           | 0.21     | 13.3  | 0.076     |
| BrK11-45-1     | Tubiacanga, Rio de Janeiro | -22.78517 | -43.22684 | ovitrap          | larva      | female | -           | 0.20     | 10.8  | 0.133     |
| BrK11-53-1     | Tubiacanga, Rio de Janeiro | -22.78455 | -43.22583 | ovitrap          | larva      | male   | -           | 0.18     | 10.3  | 0.154     |
| BrK11-54-2     | Tubiacanga, Rio de Janeiro | -22.78435 | -43.22655 | ovitrap          | larva      | male   | -           | 0.19     | 8.5   | 0.202     |
| BrK11-60-1     | Tubiacanga, Rio de Janeiro | -22.78426 | -43.22812 | ovitrap          | larva      | male   | -           | 0.20     | 10.0  | 0.171     |
| Vi14-01-wt     | Ho Chi Minh City           | -         | -         | ovitrap          | larva      | male   | -           | 0.18     | 7.2   | 0.252     |
| Vi14-02-wt     | Ho Chi Minh City           | -         | -         | ovitrap          | larva      | male   | -           | 0.20     | 9.8   | 0.124     |
| Vi14-03-wt     | Ho Chi Minh City           | -         | -         | ovitrap          | larva      | male   | -           | 0.19     | 6.7   | 0.283     |

|            |                  |   |   |         |       |        |   |      |      |       |
|------------|------------------|---|---|---------|-------|--------|---|------|------|-------|
| Vi14-04-wt | Ho Chi Minh City | - | - | ovitrap | larva | male   | - | 0.21 | 10.1 | 0.114 |
| Vi14-05-wt | Ho Chi Minh City | - | - | ovitrap | larva | male   | - | 0.19 | 7.5  | 0.227 |
| Vi14-06-wt | Ho Chi Minh City | - | - | ovitrap | larva | male   | - | 0.19 | 8.1  | 0.195 |
| Vi14-07-wt | Ho Chi Minh City | - | - | ovitrap | larva | male   | - | 0.09 | 7.4  | 0.221 |
| Vi14-10-wt | Ho Chi Minh City | - | - | ovitrap | larva | female | - | 0.19 | 8.0  | 0.213 |
| Vi14-11-wt | Ho Chi Minh City | - | - | ovitrap | larva | female | - | 0.15 | 6.4  | 0.294 |
| Vi14-12-wt | Ho Chi Minh City | - | - | ovitrap | larva | male   | - | 0.18 | 6.1  | 0.314 |
| Vi14-14-wt | Ho Chi Minh City | - | - | ovitrap | larva | female | - | 0.14 | 7.4  | 0.250 |
| Vi14-16-wt | Ho Chi Minh City | - | - | ovitrap | larva | female | - | 0.17 | 6.5  | 0.296 |
| Vi14-17-wt | Ho Chi Minh City | - | - | ovitrap | larva | male   | - | 0.18 | 7.1  | 0.234 |
| Vi14-18-wt | Ho Chi Minh City | - | - | ovitrap | larva | female | - | 0.15 | 5.5  | 0.378 |
| Vi14-19-wt | Ho Chi Minh City | - | - | ovitrap | larva | male   | - | 0.19 | 7.2  | 0.254 |
