# Supplementary material for: The queenslandensis and the type Form of the Dengue Fever Mosquito (Aedes aegypti L.) Are Genomically Indistinguishable
Source: PubMed Central journal article supplement (PMC5091912; doi:10.1371/journal.pntd.0005096), 2016-11-02

# Singapore

# Queensland

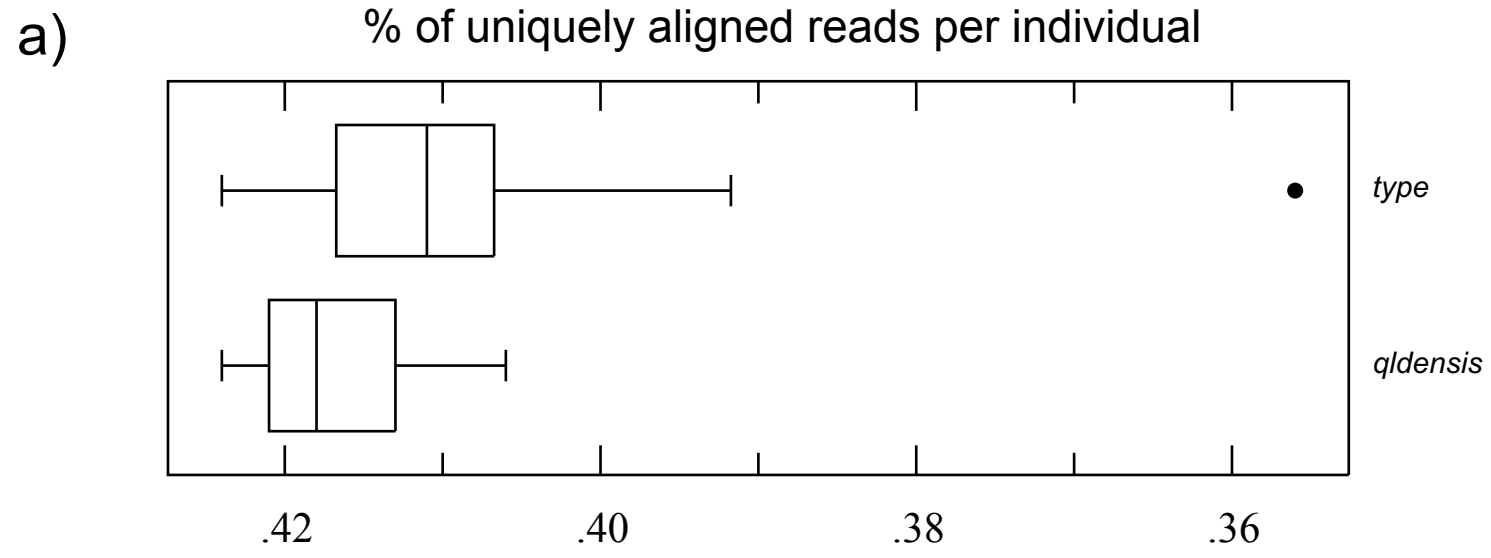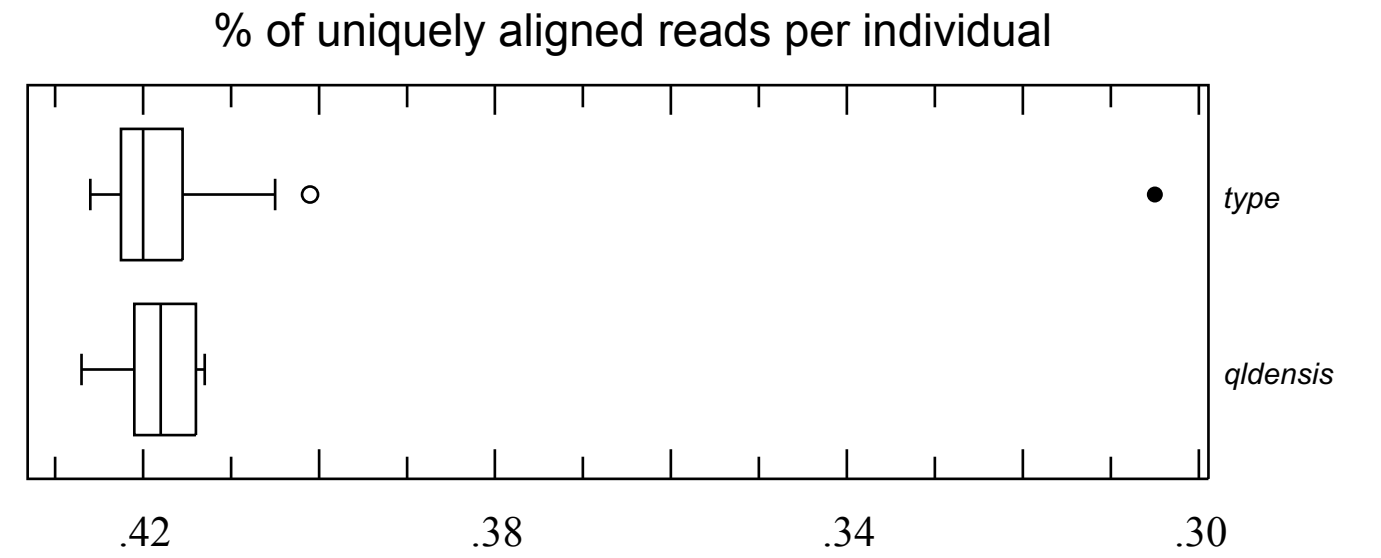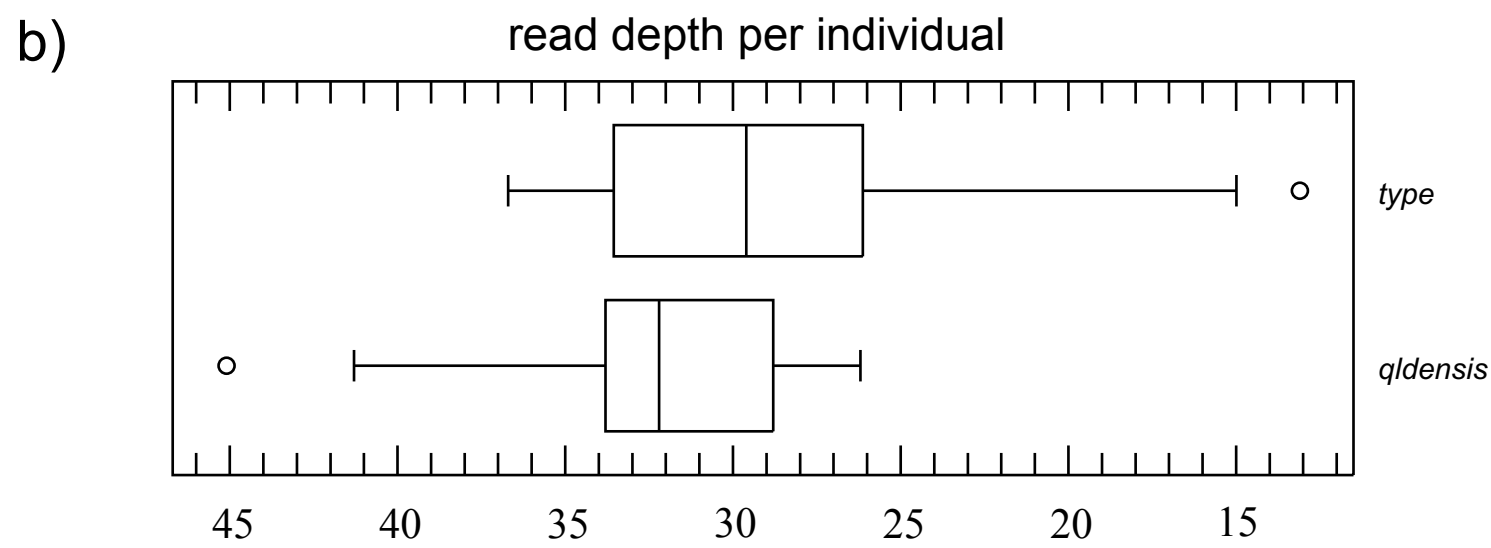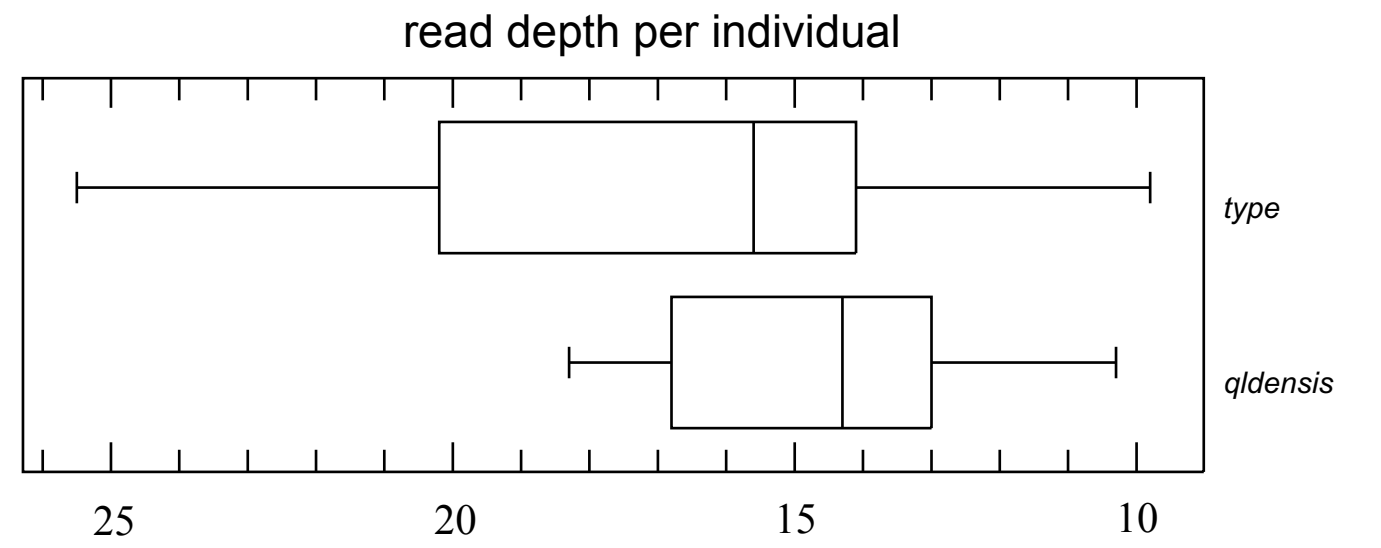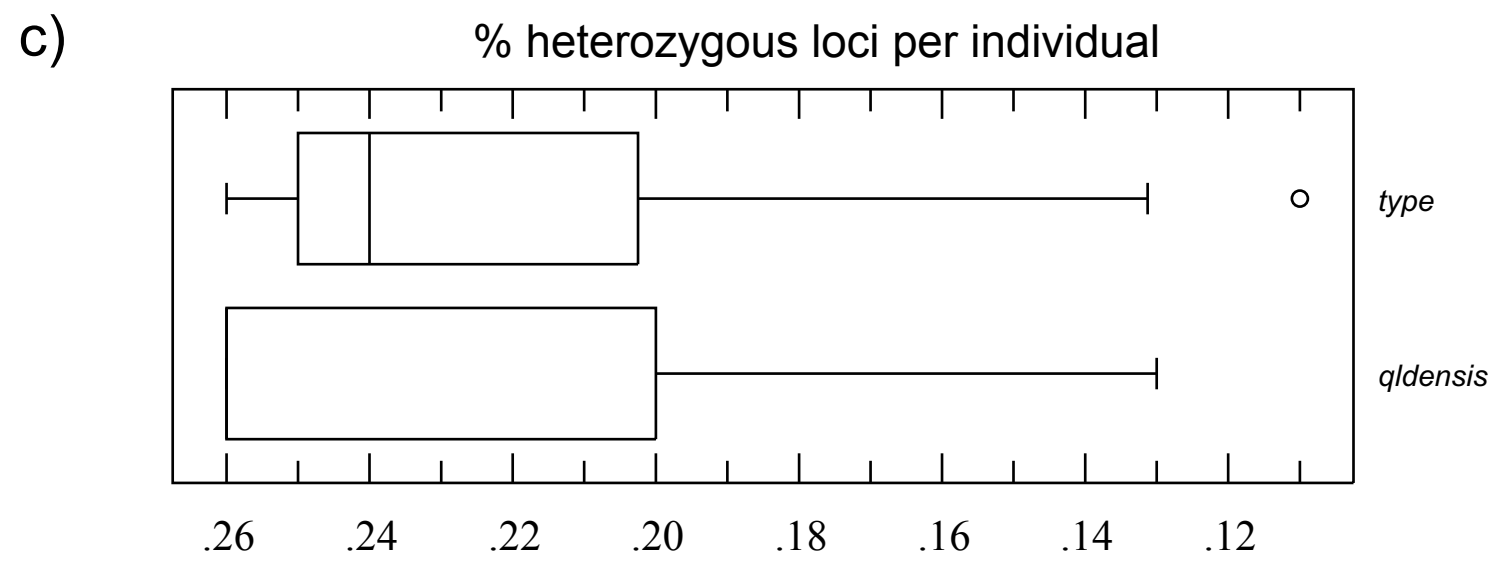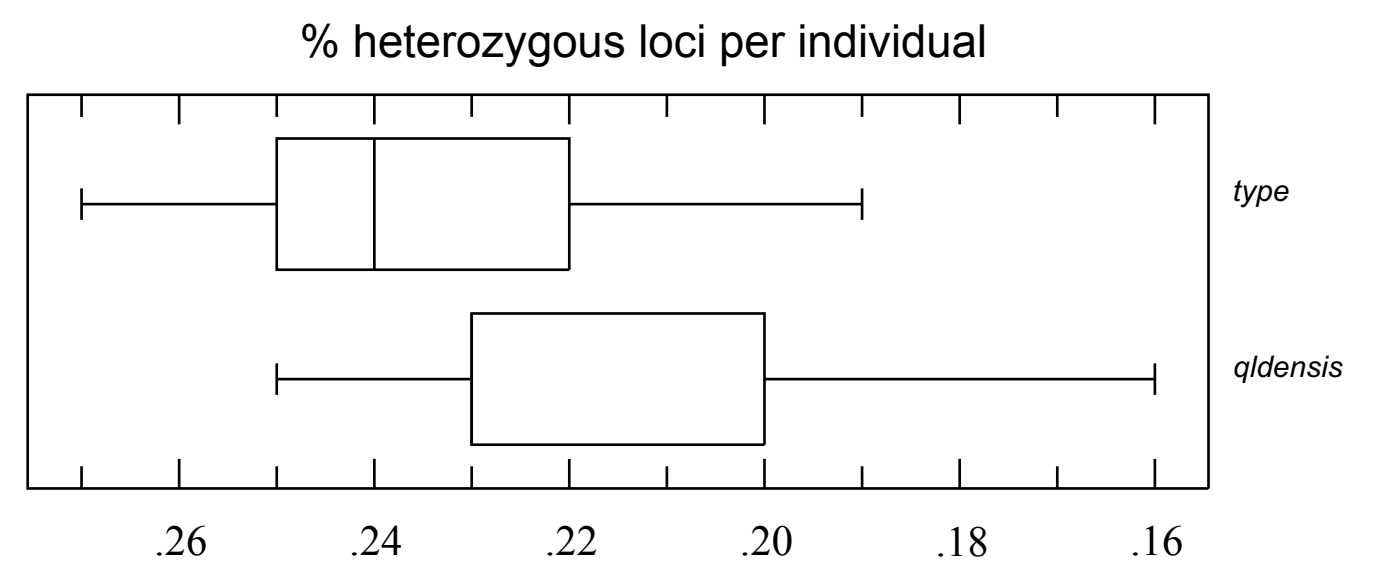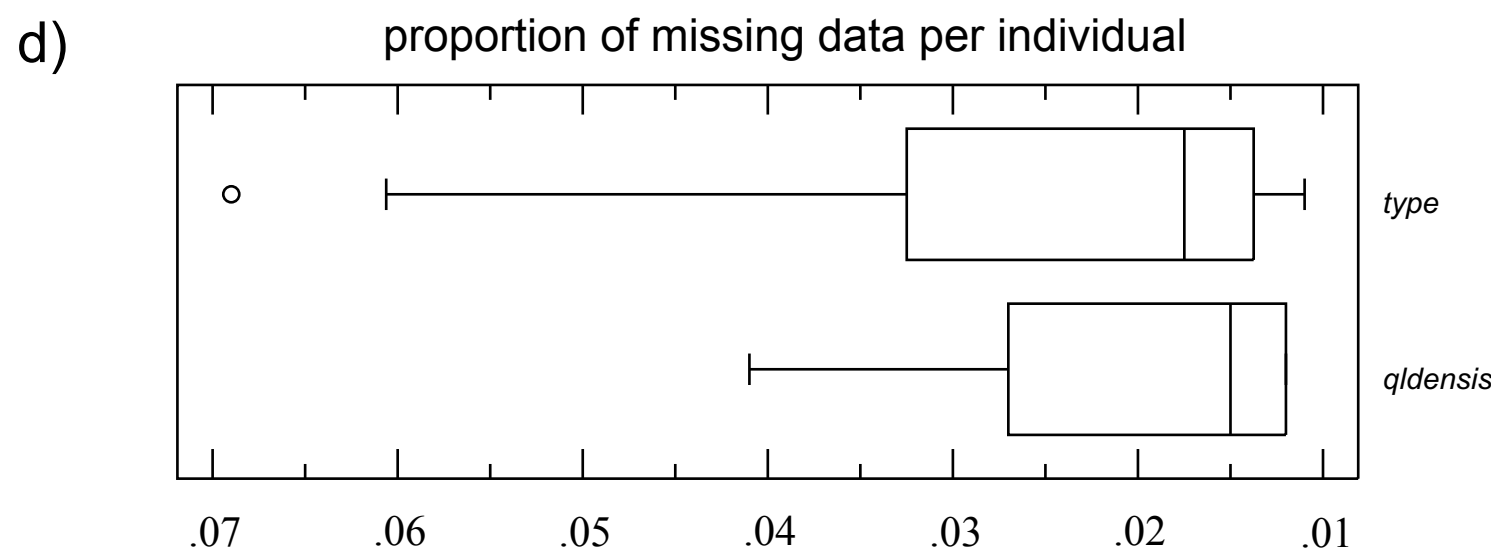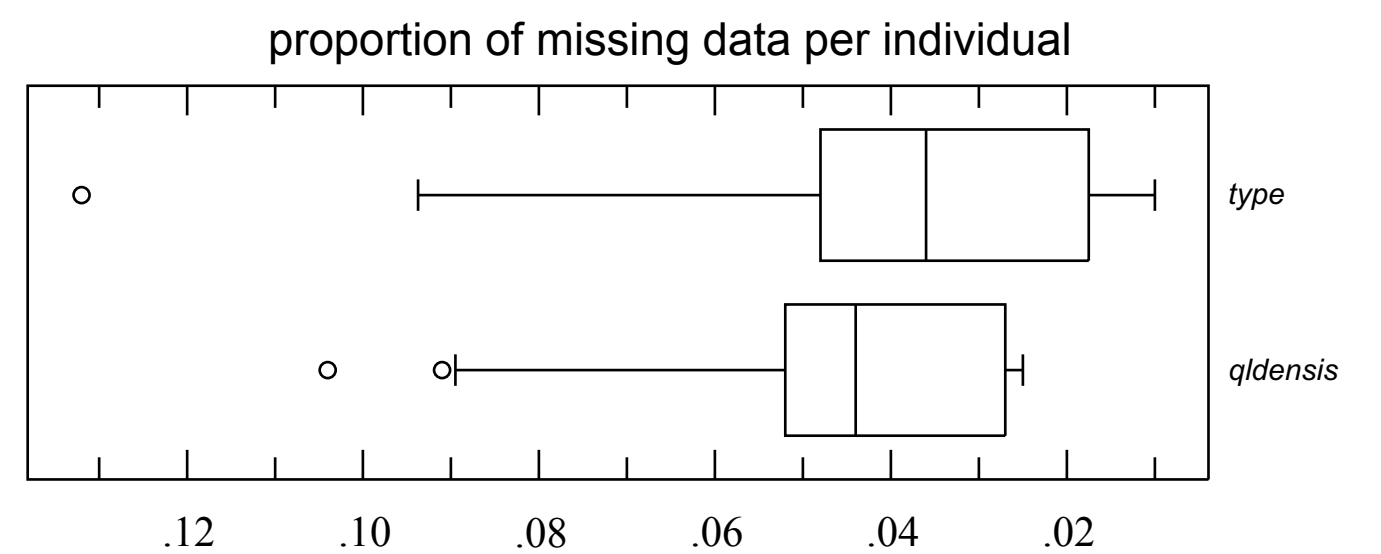

Supplement: pntd.0005096.s005.pdf [file pntd.0005096.s005.pdf]
